# Supplementary material
Source: PubMed Central journal article supplement (PMC6472179)
Supplement: RichardsonSupplementalMaterial.pdf [file RichardsonSupplementalMaterial.pdf]

## **Supplementary Material**

Table S1. List of variables from the UK Biobank used in this study.

| <b>Characteristic</b>                      | <b>Variable ID in UK Biobank</b> | <b>URL</b>                                                                                                                    |
|--------------------------------------------|----------------------------------|-------------------------------------------------------------------------------------------------------------------------------|
| Neuroticism                                | 20127                            | <a href="http://biobank.ctsu.ox.ac.uk/crystal/field.cgi?id=20127">http://biobank.ctsu.ox.ac.uk/crystal/field.cgi?id=20127</a> |
| Health rating                              | 2178                             | <a href="http://biobank.ctsu.ox.ac.uk/crystal/field.cgi?id=2178">http://biobank.ctsu.ox.ac.uk/crystal/field.cgi?id=2178</a>   |
| Age (years)                                | 21003                            | <a href="http://biobank.ctsu.ox.ac.uk/crystal/field.cgi?id=21003">http://biobank.ctsu.ox.ac.uk/crystal/field.cgi?id=21003</a> |
| Gender                                     | 31                               | <a href="http://biobank.ctsu.ox.ac.uk/crystal/field.cgi?id=31">http://biobank.ctsu.ox.ac.uk/crystal/field.cgi?id=31</a>       |
| Current smoker                             | 20116                            | <a href="http://biobank.ctsu.ox.ac.uk/crystal/field.cgi?id=20116">http://biobank.ctsu.ox.ac.uk/crystal/field.cgi?id=20116</a> |
| < 5 portions of fruit / vegetables per day | 1289                             | <a href="http://biobank.ctsu.ox.ac.uk/crystal/field.cgi?id=1289">http://biobank.ctsu.ox.ac.uk/crystal/field.cgi?id=1289</a>   |
|                                            | 1299                             | <a href="http://biobank.ctsu.ox.ac.uk/crystal/field.cgi?id=1299">http://biobank.ctsu.ox.ac.uk/crystal/field.cgi?id=1299</a>   |
|                                            | 1309                             | <a href="http://biobank.ctsu.ox.ac.uk/crystal/field.cgi?id=1309">http://biobank.ctsu.ox.ac.uk/crystal/field.cgi?id=1309</a>   |
| Alcohol daily or almost daily              | 1558                             | <a href="http://biobank.ctsu.ox.ac.uk/crystal/field.cgi?id=1558">http://biobank.ctsu.ox.ac.uk/crystal/field.cgi?id=1558</a>   |
| Types of physical activity in last 4 weeks | 6164                             | <a href="http://biobank.ctsu.ox.ac.uk/crystal/field.cgi?id=6164">http://biobank.ctsu.ox.ac.uk/crystal/field.cgi?id=6164</a>   |
| BMI (kg/m <sup>2</sup> )                   | 21001                            | <a href="http://biobank.ctsu.ox.ac.uk/crystal/field.cgi?id=21001">http://biobank.ctsu.ox.ac.uk/crystal/field.cgi?id=21001</a> |
| Systolic blood pressure (mm Hg)            | 4080                             | <a href="http://biobank.ctsu.ox.ac.uk/crystal/field.cgi?id=4080">http://biobank.ctsu.ox.ac.uk/crystal/field.cgi?id=4080</a>   |
| Grip strength (kg)                         | 46                               | <a href="http://biobank.ctsu.ox.ac.uk/crystal/field.cgi?id=46">http://biobank.ctsu.ox.ac.uk/crystal/field.cgi?id=46</a>       |
|                                            | 47                               | <a href="http://biobank.ctsu.ox.ac.uk/crystal/field.cgi?id=47">http://biobank.ctsu.ox.ac.uk/crystal/field.cgi?id=47</a>       |
| FEV1 (litres)                              | 3063                             | <a href="http://biobank.ctsu.ox.ac.uk/crystal/field.cgi?id=3063">http://biobank.ctsu.ox.ac.uk/crystal/field.cgi?id=3063</a>   |
| Reaction time (ms)                         | 20023                            | <a href="http://biobank.ctsu.ox.ac.uk/crystal/field.cgi?id=20023">http://biobank.ctsu.ox.ac.uk/crystal/field.cgi?id=20023</a> |
| Vascular or heart problems                 | 6150                             | <a href="http://biobank.ctsu.ox.ac.uk/crystal/field.cgi?id=6150">http://biobank.ctsu.ox.ac.uk/crystal/field.cgi?id=6150</a>   |
| Diabetes                                   | 2443                             | <a href="http://biobank.ctsu.ox.ac.uk/crystal/field.cgi?id=2443">http://biobank.ctsu.ox.ac.uk/crystal/field.cgi?id=2443</a>   |
| Asthma                                     | 6152                             | <a href="http://biobank.ctsu.ox.ac.uk/crystal/field.cgi?id=6152">http://biobank.ctsu.ox.ac.uk/crystal/field.cgi?id=6152</a>   |
| Chronic Lung disease                       | 6152                             | <a href="http://biobank.ctsu.ox.ac.uk/crystal/field.cgi?id=6152">http://biobank.ctsu.ox.ac.uk/crystal/field.cgi?id=6152</a>   |
| Cancer                                     | 2453                             | <a href="http://biobank.ctsu.ox.ac.uk/crystal/field.cgi?id=2453">http://biobank.ctsu.ox.ac.uk/crystal/field.cgi?id=2453</a>   |
| Deep vein thrombosis                       | 6152                             | <a href="http://biobank.ctsu.ox.ac.uk/crystal/field.cgi?id=6152">http://biobank.ctsu.ox.ac.uk/crystal/field.cgi?id=6152</a>   |
| Pulmonary embolism                         | 6152                             | <a href="http://biobank.ctsu.ox.ac.uk/crystal/field.cgi?id=6152">http://biobank.ctsu.ox.ac.uk/crystal/field.cgi?id=6152</a>   |
| University degree                          | 6138                             | <a href="http://biobank.ctsu.ox.ac.uk/crystal/field.cgi?id=6138">http://biobank.ctsu.ox.ac.uk/crystal/field.cgi?id=6138</a>   |
| Townsend index                             | 189                              | <a href="http://biobank.ctsu.ox.ac.uk/crystal/field.cgi?id=189">http://biobank.ctsu.ox.ac.uk/crystal/field.cgi?id=189</a>     |

Table S2. Results of Cox proportional hazard regression between neuroticism and all-cause mortality, stratified by self-reported health.

| <b>Health rating strata</b> | <b>Covariates</b> | <b>HR [95% CI]</b> | <b>P</b>               |
|-----------------------------|-------------------|--------------------|------------------------|
| All                         | Age, sex          | 1.03 [1.02 – 1.04] | $<1 \times 10^{-16}$   |
|                             | All covariates    | 0.99 [0.98-1.00]   | 0.05                   |
| Excellent                   | Age, sex          | 0.99 [0.98 – 1.03] | 0.52                   |
|                             | All covariates    | 0.99 [0.96 – 1.02] | 0.38                   |
| Good                        | Age, sex          | 0.99 [0.98 – 1.00] | 0.17                   |
|                             | All covariates    | 0.98 [0.97-1.00]   | 0.01                   |
| Fair                        | Age, sex          | 0.97 [0.96 – 0.98] | $1.60 \times 10^{-08}$ |
|                             | All covariates    | 0.97 [0.95 – 0.99] | $7.7 \times 10^{-04}$  |
| Poor                        | Age, sex          | 0.97 [0.96 – 0.98] | $2.10 \times 10^{-05}$ |
|                             | All covariates    | 0.96 [0.93 – 0.98] | $7.3 \times 10^{-04}$  |

Table S3. Results of Linear/Logistic regression between neuroticism and all other covariates analysed by Gale et al, stratified by self-reported health.

**Current smoker**

| Health rating strata | n       | OR    | SE    | P                      |
|----------------------|---------|-------|-------|------------------------|
| All                  | 259,969 | 1.070 | 0.002 | $<1 \times 10^{-300}$  |
| Excellent            | 48,483  | 1.039 | 0.006 | $5.27 \times 10^{-11}$ |
| Good                 | 151,304 | 1.026 | 0.003 | $8.09 \times 10^{-26}$ |
| Fair                 | 49,549  | 1.025 | 0.003 | $5.61 \times 10^{-16}$ |
| Poor                 | 10,633  | 1.045 | 0.006 | $4.20 \times 10^{-14}$ |

**Fruit and vegetable portions**

| Health rating strata | n       | OR    | SE    | P                      |
|----------------------|---------|-------|-------|------------------------|
| All                  | 400,685 | 0.976 | 0.001 | $1.68 \times 10^{-95}$ |
| Excellent            | 71,268  | 0.987 | 0.003 | $2.05 \times 10^{-5}$  |
| Good                 | 233,047 | 0.985 | 0.002 | $1.44 \times 10^{-20}$ |
| Fair                 | 79,177  | 0.981 | 0.003 | $4.07 \times 10^{-14}$ |
| Poor                 | 17,193  | 0.983 | 0.005 | $9.67 \times 10^{-4}$  |

**Alcohol**

| Health rating strata | n       | Beta   | SE     | P                       |
|----------------------|---------|--------|--------|-------------------------|
| All                  | 400,508 | -0.020 | 0.0007 | $3.55 \times 10^{-158}$ |
| Excellent            | 71,253  | 0.007  | 0.002  | $1.27 \times 10^{-4}$   |
| Good                 | 232,975 | 0.001  | 0.001  | 0.225                   |
| Fair                 | 79,116  | 0.002  | 0.002  | 0.311                   |
| Poor                 | 17,164  | 0.009  | 0.004  | 0.016                   |

**Amount of physical activity**

| Health rating strata | n       | Beta   | SE     | P                      |
|----------------------|---------|--------|--------|------------------------|
| All                  | 400,448 | -0.019 | 0.0003 | $<1 \times 10^{-300}$  |
| Excellent            | 71,257  | -0.008 | 0.0008 | $2.96 \times 10^{-26}$ |
| Good                 | 232,959 | -0.007 | 0.0004 | $7.70 \times 10^{-64}$ |
| Fair                 | 79,092  | -0.006 | 0.0008 | $3.81 \times 10^{-12}$ |
| Poor                 | 17,140  | -0.007 | 0.002  | 0.003                  |

**BMI**

| Health rating strata | n       | Beta   | SE    | P                       |
|----------------------|---------|--------|-------|-------------------------|
| All                  | 398,636 | 0.035  | 0.002 | $5.62 \times 10^{-50}$  |
| Excellent            | 71,091  | -0.063 | 0.005 | $1.98 \times 10^{-40}$  |
| Good                 | 232,217 | -0.079 | 0.003 | $5.74 \times 10^{-161}$ |
| Fair                 | 78,536  | -0.118 | 0.006 | $5.78 \times 10^{-97}$  |
| Poor                 | 16,792  | -0.055 | 0.015 | $1.74 \times 10^{-4}$   |

**Systolic blood pressure**

| Health rating strata | n       | Beta   | SE    | P                       |
|----------------------|---------|--------|-------|-------------------------|
| All                  | 373,520 | -0.217 | 0.009 | $1.23 \times 10^{-119}$ |
| Excellent            | 65,888  | -0.254 | 0.025 | $2.56 \times 10^{-24}$  |
| Good                 | 217,670 | -0.290 | 0.013 | $8.01 \times 10^{-113}$ |
| Fair                 | 74,006  | -0.316 | 0.020 | $8.24 \times 10^{-55}$  |
| Poor                 | 15,956  | -0.236 | 0.043 | $6.04 \times 10^{-8}$   |

**Grip strength (left hand)**

| Health rating strata | n       | Beta   | SE    | P                       |
|----------------------|---------|--------|-------|-------------------------|
| All                  | 398,503 | -0.243 | 0.004 | $<1 \times 10^{-300}$   |
| Excellent            | 71,019  | -0.147 | 0.010 | $2.38 \times 10^{-53}$  |
| Good                 | 231,999 | -0.136 | 0.005 | $3.95 \times 10^{-168}$ |
| Fair                 | 78,592  | -0.143 | 0.008 | $3.07 \times 10^{-63}$  |
| Poor                 | 16,893  | -0.173 | 0.021 | $2.99 \times 10^{-16}$  |

**Grip strength (right hand)**

| Health rating strata | n       | Beta   | SE    | P                       |
|----------------------|---------|--------|-------|-------------------------|
| All                  | 398,548 | -0.243 | 0.004 | $<1 \times 10^{-300}$   |
| Excellent            | 71,024  | -0.162 | 0.010 | $4.23 \times 10^{-64}$  |
| Good                 | 232,027 | -0.139 | 0.005 | $2.95 \times 10^{-173}$ |
| Fair                 | 78,565  | -0.136 | 0.009 | $1.81 \times 10^{-57}$  |
| Poor                 | 16,932  | -0.124 | 0.021 | $1.84 \times 10^{-9}$   |

**FEV1**

| Health rating strata | n       | Beta    | SE     | P                         |
|----------------------|---------|---------|--------|---------------------------|
| All                  | 362,785 | -0.008  | 0.0003 | 1.54 x 10 <sup>-158</sup> |
| Excellent            | 66,884  | -0.0006 | 0.0008 | 0.420                     |
| Good                 | 213,861 | 0.0004  | 0.0004 | 0.313                     |
| Fair                 | 68,742  | 0.005   | 0.0007 | 5.10 x 10 <sup>-12</sup>  |
| Poor                 | 13,298  | 0.001   | 0.002  | 0.393                     |

**Reaction time**

| Health rating strata | n       | Beta  | SE    | P                         |
|----------------------|---------|-------|-------|---------------------------|
| All                  | 397,418 | 1.561 | 0.053 | 2.28 x 10 <sup>-187</sup> |
| Excellent            | 70,971  | 0.432 | 0.002 | 0.002                     |
| Good                 | 231,491 | 0.569 | 0.072 | 2.06 x 10 <sup>-15</sup>  |
| Fair                 | 78,179  | 1.184 | 0.122 | 3.58 x 10 <sup>-22</sup>  |
| Poor                 | 16,777  | 2.607 | 0.203 | 7.13 x 10 <sup>-18</sup>  |

**Vascular or health problems**

| Health rating strata | n       | OR    | SE    | P                        |
|----------------------|---------|-------|-------|--------------------------|
| All                  | 400,680 | 1.060 | 0.001 | <1x10 <sup>-300</sup>    |
| Excellent            | 71,268  | 1.029 | 0.004 | 2.94 x 10 <sup>-12</sup> |
| Good                 | 233,043 | 1.014 | 0.002 | 1.13 x 10 <sup>-18</sup> |
| Fair                 | 79,176  | 0.997 | 0.002 | 0.228                    |
| Poor                 | 17,193  | 1.025 | 0.005 | 7.57 x 10 <sup>-8</sup>  |

**Diabetes**

| Health rating strata | n       | OR    | SE    | P                        |
|----------------------|---------|-------|-------|--------------------------|
| All                  | 399,992 | 1.041 | 0.002 | 1.86 x 10 <sup>-74</sup> |
| Excellent            | 71,225  | 0.994 | 0.016 | 0.693                    |
| Good                 | 232,755 | 0.967 | 0.004 | 1.43 x 10 <sup>-17</sup> |
| Fair                 | 78,933  | 0.955 | 0.004 | 2.60 x 10 <sup>-38</sup> |
| Poor                 | 17,079  | 0.992 | 0.006 | 0.162                    |

### **Asthma**

| <b>Health rating strata</b> | <b>n</b> | <b>OR</b> | <b>SE</b> | <b>P</b>                |
|-----------------------------|----------|-----------|-----------|-------------------------|
| All                         | 340,273  | 1.050     | 0.002     | $1.32 \times 10^{-231}$ |
| Excellent                   | 62,425   | 1.035     | 0.005     | $2.39 \times 10^{-12}$  |
| Good                        | 198,649  | 1.020     | 0.002     | $7.72 \times 10^{-20}$  |
| Fair                        | 65,576   | 1.011     | 0.003     | $4.33 \times 10^{-4}$   |
| Poor                        | 13,623   | 1.035     | 0.006     | $3.72 \times 10^{-10}$  |

### **Chronic lung disease**

| <b>Health rating strata</b> | <b>n</b> | <b>OR</b> | <b>SE</b> | <b>P</b>                |
|-----------------------------|----------|-----------|-----------|-------------------------|
| All                         | 311,065  | 1.134     | 0.004     | $1.13 \times 10^{-269}$ |
| Excellent                   | 59,237   | 1.072     | 0.022     | $9.34 \times 10^{-4}$   |
| Good                        | 182,419  | 1.068     | 0.007     | $1.65 \times 10^{-23}$  |
| Fair                        | 57,751   | 1.022     | 0.006     | $3.22 \times 10^{-4}$   |
| Poor                        | 11,658   | 1.058     | 0.008     | $1.00 \times 10^{-12}$  |

### **Cancer**

| <b>Health rating strata</b> | <b>n</b> | <b>OR</b> | <b>SE</b> | <b>P</b>               |
|-----------------------------|----------|-----------|-----------|------------------------|
| All                         | 399,819  | 1.007     | 0.002     | $3.71 \times 10^{-4}$  |
| Excellent                   | 71,199   | 0.998     | 0.007     | 0.788                  |
| Good                        | 232,629  | 0.985     | 0.003     | $1.48 \times 10^{-8}$  |
| Fair                        | 78,914   | 0.977     | 0.004     | $8.37 \times 10^{-11}$ |
| Poor                        | 17,077   | 0.954     | 0.007     | $1.80 \times 10^{-13}$ |

### **Deep vein thrombosis**

| <b>Health rating strata</b> | <b>n</b> | <b>OR</b> | <b>SE</b> | <b>P</b>               |
|-----------------------------|----------|-----------|-----------|------------------------|
| All                         | 280,183  | 1.042     | 0.004     | $4.52 \times 10^{-32}$ |
| Excellent                   | 52,905   | 0.999     | 0.015     | 0.915                  |
| Good                        | 164,602  | 0.998     | 0.006     | 0.654                  |
| Fair                        | 52,477   | 0.992     | 0.007     | 0.226                  |
| Poor                        | 10,199   | 0.982     | 0.010     | 0.064                  |

**Pulmonary embolism**

| Health rating strata | n       | OR    | SE    | P                      |
|----------------------|---------|-------|-------|------------------------|
| All                  | 275,516 | 1.050 | 0.006 | $2.11 \times 10^{-20}$ |
| Excellent            | 52,421  | 1.022 | 0.025 | 0.368                  |
| Good                 | 162,249 | 1.002 | 0.009 | 0.808                  |
| Fair                 | 51,123  | 0.973 | 0.010 | 0.004                  |
| Poor                 | 9,723   | 0.986 | 0.013 | 0.287                  |

**University degree**

| Health rating strata | n       | OR    | SE    | P                      |
|----------------------|---------|-------|-------|------------------------|
| All                  | 397,687 | 0.948 | 0.001 | $<1 \times 10^{-300}$  |
| Excellent            | 70,720  | 0.967 | 0.003 | $1.54 \times 10^{-32}$ |
| Good                 | 231,384 | 0.973 | 0.002 | $1.55 \times 10^{-76}$ |
| Fair                 | 78,568  | 0.971 | 0.003 | $2.56 \times 10^{-32}$ |
| Poor                 | 17,015  | 0.954 | 0.006 | $1.28 \times 10^{-17}$ |

**Townsend deprivation index**

| Health rating strata | n       | Beta  | SE     | P                      |
|----------------------|---------|-------|--------|------------------------|
| All                  | 400,195 | 0.020 | 0.0005 | $<1 \times 10^{-300}$  |
| Excellent            | 71,182  | 0.005 | 0.001  | $3.75 \times 10^{-5}$  |
| Good                 | 232,793 | 0.007 | 0.0006 | $8.32 \times 10^{-25}$ |
| Fair                 | 79,043  | 0.011 | 0.001  | $6.58 \times 10^{-25}$ |
| Poor                 | 17,177  | 0.025 | 0.002  | $1.67 \times 10^{-23}$ |
